# Supplementary material for: Effects of cholic acid modified glucosamine on chondrogenic differentiation
Source: Royal Society of Chemistry journal article supplement (doi:10.1039/c6ra09547j), 2016-01-01
Supplement: c6ra09547j1.pdf [file c6ra09547j1.pdf]

### Supplementary Informations:

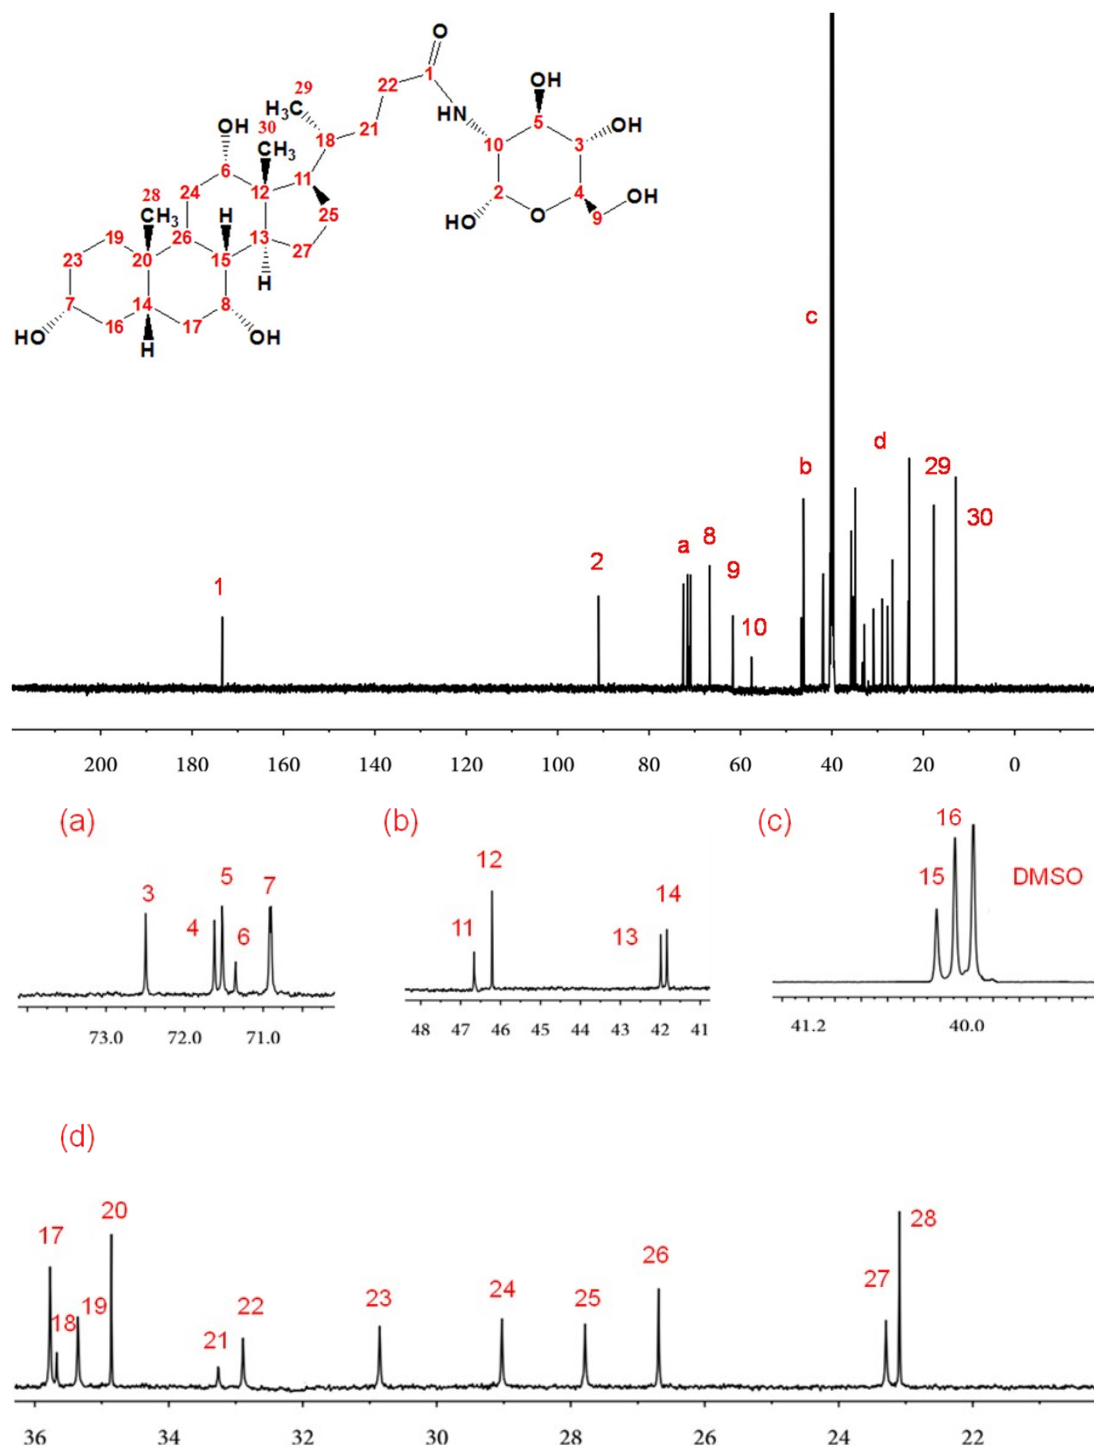

**Fig. S1**  $^{13}\text{C}$ -NMR of CAGA,  $\text{DMSO-}d_6$  as solvent.

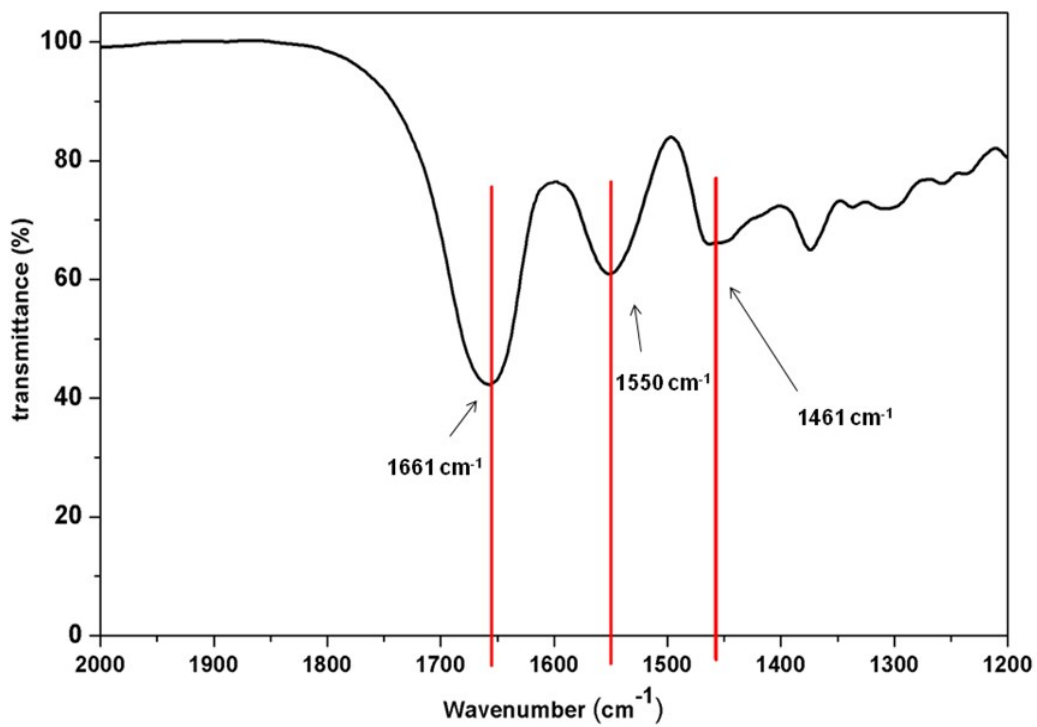

**Fig. S2** Partial enlarged FT-IR spectrum of CAGA.

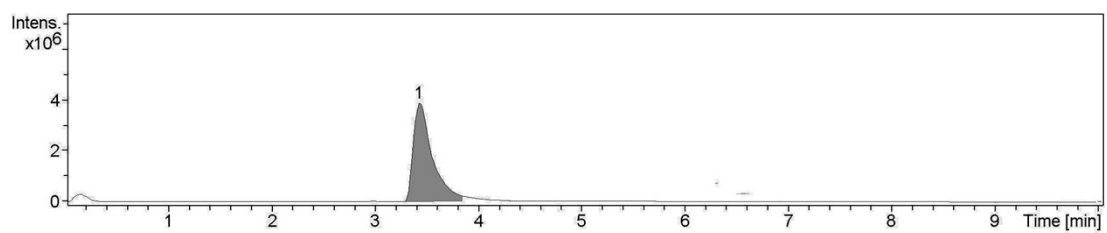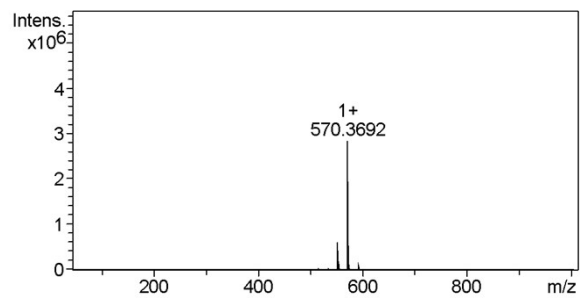

**Fig. S3** LC-MS of CAGA.
